# Supplementary material for: A scoping review of seismic risk communication in Europe
Source: Frontiers journal article supplement (doi:10.3389/feart.2023.1155576), 2023-07-03
Supplement: Data_Sheet_1.docx [file Data_Sheet_1.docx]

***Supplementary Material***

# Description

*Supplementary Tables*

- **Table S1**:  strings used to select the publications electronically
- **Table S2**: parameters and attributes that were used in this study

*Supplementary References*

- **References S1**: list of the 109 publications shortlisted for our scoping review according to the selection criteria described in the manuscript and Table S1

# Supplementary Tables

**Table S1**. Search strings used to select publications in three databases: Google Scholar, Scopus, and Web of Science. The filters applied were “find articles with the exact phrase” and “anywhere in the article”

| **Google Scholar** | **Scopus** | **Web of Science** |
| --- | --- | --- |
| Europe "seismic risk communication" | “seismic risk communication” | "seismic risk communication" OR "communicating seismic risk" OR "communicate seismic risk" OR "earthquake risk communication" OR "communicating earthquake risk" OR "communicate earthquake risk" |
| Europe "earthquake risk communication" | "EQ risk communication" | “seismic risk education” OR "educational seismology" |
| Europe "seismic risk education" | "in Europe" "seismic risk education" OR "earthquake risk education" OR "educational seismology" "seismic risk" | "education campaign*" "seismic risk" |
| Europe seismic "risk education campaigns" | Seismic Risk Education | “earthquake risk education” |
| Europe earthquake " risk education campaigns" | educational seismology |  |
| educational seismology -US -California  -Mexico -Asia -Japan | Europe " awareness campaign" OR " awareness campaigns" "seismic risk" |  |
|  | awareness seismic campaign |  |
|  | Seismic And Risk and Communication |  |
|  | seismic AND risk AND education |  |

**Table S2**: Parameters and attributes retrieved from the 109 selected publication grouped as follows: when (a), who (b), what (c), why (d), how (e1, e2)

(a)

| **WHEN  in the risk communication lifecycle: before, during, after the event Prevention-preparedness/during the crisis/recovery** | | | |
| --- | --- | --- | --- |
| Ordinary time/ Long term preparedness, prevention, or adaptation | during crisis /initial stage/ warning communication | During crisis/maintenance/ Emergency and crisis communication | After crisis/ recovery and rehabilitation communication |
| 1 = yes  0 = no 11 = doubt | 1 = yes 0 = no 11 = doubt | 1 = yes 0 = no 11 = doubt | 1 = yes 0 = no 11 = doubt |

(b)

| **WHO** | | | | | | | |
| --- | --- | --- | --- | --- | --- | --- | --- |
|  |  |  |  | **Engagement/co-production modes** | | |  |
| Sender/ organiser/ messenger | | Receiver/ target audience | | Receiver engagement in communication | If yes | | |
| 1=public agencies working in DRM;  2= NGOs;  3=public auth. working in edu.  4= students 5= citizens/general public;  6=private company 7= Research centres/university   10=other  11=doubt | specify OTHER | 1=public ag. DRM;  2= NGOs;  3=public authorities working in education  4= citizens/general public;  5= students/pupils;  6= private companies;    10=other  11=doubt 12=mixed 13=multiple | specify OTHER | 1=yes  0= no 11=doubt | 1=co-design  2=co-development 3=co-implementation 4=co-assessment   10=other  11=doubt | specify OTHER | specify doubts |

(c)

| **WHAT** | | | |
| --- | --- | --- | --- |
| Communication models  (Stewart and Hurt 2022) | | Research focus  (Balong-Way et al.2019) | |
| 1 = one way 2 = two ways 3 = three ways  10 = other  11 = doubt | specify OTHER | 1 = sender/messenger  2 = message attributes  3 = audiences  10 = other  11 = doubt  12 = mixed 13 = multiple | specify OTHER |

(d)

| **WHY** | | | |
| --- | --- | --- | --- |
| Communication aims   (Bostrom et al. 2018) | | | |
| 1 = sharing information  2 = changing beliefs  3 = changing behaviours    5 = raise awareness   10 = other  11 = doubt 12 = mixed 13 = multiple | specify OTHER  (i.e., prevention, preparedness, find a strategy...) | specify mixed | specify multiple |

(e 1)

| **HOW** | | | | | | | | | | | | | | |
| --- | --- | --- | --- | --- | --- | --- | --- | --- | --- | --- | --- | --- | --- | --- |
| Risk communication tools | | Risk management tools used for communication purposes  (Venutti et al. 2021) | | | Channels | | Methods | | Modes |  | Funded by | |  | Risk communication evaluation included |
| 1=leaflets, documents; lesson plans 2=videos; video scribing 3= mock drills/simulation exercises;  4= serious games; serious videogames 5= risk communication plan;  6= hands-on tools (e.g., plate tectonics model, seismometers, shake tables, edu-models) 7= infographics  8=augmented reality 10=other  11=doubt 12=mixed 13=multiple | specify OTHER | 1=hazard, risk, vulnerability, or exposure maps;  2=emergency plans;  3= warning/alert messages;  4= past event history;  5=risk reduction plans;  6=recovery plans;  10=other  11=doubt 13=Multiple tools | specify OTHER | 1=face to face;  2= social media;  3= website 4=Tv, radio;  5= newspapers;  6=smartphone apps;   10=other 13= multiple channels | | specify other/  specify multiple | 1= interviews 2= focus groups/outreach events 3=surveys 4=classroom activities    10=other  11=doubt 12=mixed 13=multiple channels | specify other/  multiple | 1=in person 2=remotely/  virtual 3=hybrid     10=other  11=doubt 12= mixed methods | specify other | | 1=public national agencies 2=public international agencies 3=private sector  5=not available    10=other  11=doubt 13=multiple sources | spec. other | 1=yes;  0=no;  11= doubt |

(e2)

| **THEORY (only what the authors declare)** | | | | | | | | |
| --- | --- | --- | --- | --- | --- | --- | --- | --- |
|  | **if theory is mentioned** | | | | | | | |
| Theory mentioned (NOAA 2016) | Deficit model | Social amplification of risk | Risk information seeking and processing model | Crisis and emergency communication model | Mental model | Causal model | Behavioural oriented model |  |
| y=1 n=0 doubt=11  out of scope/ review paper=3 | mentioned=1 no=0 doubt=11 | mentioned=1 no=0 doubt=11 | mentioned=1 no=0 doubt=11 | mentioned=1 no=0 doubt=11 | mentioned=1 no=0 doubt=11 | mentioned=1 no=0 doubt=11 | mentioned=1 no=0 doubt=11 | Other theory is directly mentioned or used: specify |

# Supplementary References

# References S1

Albulescu, A.C., Larion, D., Grozavu, A. (2021). Seismic Risk Perception and Seismic Adjustments in Vaslui City, Romania. Nat. Hazards Rev. 22, 05021005. doi:10.1061/(ASCE)NH.1527-6996.0000453

Almeida, A., García Fernández, B., Rodrigues, I. (2020). Perceptions of pre-service teachers on seismic risk and their implications for science education: a comparative study between Spain and Portugal. J. Risk. Res. 23, 762-780. doi:10.1080/13669877.2019.1617335

Amato, A., Arcoraci, L., Casarotti, E., Di Stefano, R. (2012). The INGV terremoti channel on youtube. Ann. Geophys. 55, 403-408. doi:10.4401/ag-5546

Amiresmaili, M.R., Zolala, F., Nekoei M.M., Salavatia, S., Chashmyazdan, M., Soltani, A., Savabi, J. (2021). Role of Social Media in Earthquake: A Systematic Review. Iran Red Crescent Med. J. 23, 5. doi:10.32592/ircmj.2021.23.5.447

Appleby Arnold, S., Brockdorff, N., Jakovljev, I., Zdravkovic, S. (2020). Disaster preparedness and cultural factors: a comparative study in Romania and Malta. Disasters 45, 664-690. doi:10.1111/disa.12433

Audru, J.C., Vernier, J.L., Capdeville, B., Salindre, J.J. (2013). Preparedness actions towards seismic risk mitigation for the general public in Martinique, French Lesser Antilles: A mid-term appraisal. Nat. Hazards Earth Syst. Sci. 13, 2031–2039. doi:10.5194/nhess-13-2031-2013

Avvisati, G., Bellucci Sessa, E., Colucci, O., Marfè, B., Marotta, E., Nave, R., Peluso, R., Ricci, T., Tomasone, M. (2019). Perception of risk for natural hazards in Campania Region (Southern Italy). Int. J. Disaster Risk Reduct. 40, 101164. doi:10.1016/j.ijdrr.2019.101164

Barnaba, C., Contessi, E., Girardi, M.R. (2018). A High School Students’ Geophysical Survey in a Seismically Active Area: The PRESS40 Project. Seismol. Res. Lett. 89, 1539-1545. doi:10.1785/0220170219

Baytiyeh, H., Öcal, A. (2016). High school students’ perceptions of earthquake disaster: A comparative study of Lebanon and Turkey. Int. J. Disaster Risk Reduct. 18, 56-63. doi: 10.1016/j.ijdrr.2016.06.004

Becker, J.S., Paton, D., Johnston, D.M., Ronan, K.R. (2013). Salient Beliefs About Earthquake Hazards and Household Preparedness: Salient Beliefs About Earthquake Hazards. Risk Anal. 33, 1710-1727. doi:10.1111/risa.12014

Becker, J.S., Paton, D., Johnston, D.M., Ronan, K.R., McClure, J. (2017). The role of prior experience in informing and motivating earthquake preparedness. Int. J. Disaster Risk Reduct. 22, 179-193. doi:10.1016/j.ijdrr.2017.03.006

Berenguer, J.L., Balestra, J., Jouffray, F., Mourau, F., Courboulex, F., Virieux, J. (2020). Celebrating 25 years of seismology at schools in France. Geosci. Commun. 3, 475-481. doi:10.5194/gc-3-475-2020

Bernhardsdottir, A.E., Musacchio, G., Ferreira, M.A., Falsaperla, S. (2016). Informal education for disaster risk reduction. Bull. Earthq. Eng. 14, 2105–2116. doi:10.1007/s10518-015-9771-9

Blake, D., Marlowe, J., Johnston, D. (2017). Get prepared: Discourse for the privileged?. Int. J. Disaster Risk Reduct. 25, 283-288. doi:10.1016/j.ijdrr.2017.09.012

Bossu, R., Roussel, F., Fallou, L., Landès, M., Steed, R., Mazet-Roux, G., Dupont, A., Frobert, L., Petersen, L. (2018). LastQuake: From rapid information to global seismic risk reduction. Int. J. Disaster Risk Reduct. 28, 32-42. doi:10.1016/j.ijdrr.2018.02.024

Camassi, R., Azzaro, R., Castelli, V., La Longa, F., Pessina, V., Peruzza, L. (2005). “Knowledge and practice”. Educational activities for reduction of earthquake impact: the EDURISK project. In: In: Proc. 250th Anniversary of the Lisbon Earthquake Int. Conf., Laboratório Nacional de Engenharia Civil, Lisbon, Portugal, 100-104.

Cantore, L., Bobbio, A., Di Martino, F., Petrilio, A., Simini, M., Zollo, A. (2003). The EduSeis Project in Italy: An Educational Tool for Training and Increasing Awareness of Seismic Risk. Seismol. Res. Lett. 74, 596-602. doi:10.1785/gssrl.74.5.596

Celik, S., Corbacioglu, S. (2010). Role of information in collective action in dynamic disaster environments. Disasters 34, 137-154. doi:10.1111/j.1467-7717.2009.01118.x

Çoban, M., and Göktaş, Y. (2022). Which training method is more effective in earthquake training: Digital game, drill, or traditional training?. Smart Learn. Environ. 9, 23. doi:10.1186/s40561-022-00202-0

Courboulex, F., Berenguer, J.L., Tocheport, A., Bouin, M.P., Calais, E., Esnault, Y., Larroque, C., Nolet, G., Virieux, J. (2012). Sismos a l'Ecole: A Worldwide Network of Real-Time Seismometers in Schools. Seismol. Res. Lett. 83, 870-873. doi:10.1785/0220110139

Craifaleanu, I.G., Georgescu, E.S., Borcia, I.S., Aldea, A., Vacareanu, R., Arion, C.  (2011). INFORISX: Information Website on the Seismic Risk in Romania. In Proceedings of TIEMS 2011-The International Emergency Management Society, The 18-th Annual Conference.

Crescimbene M., La Longa F., Camassi R., Pino N.A., Peruzza L. (2014). What’s the seismic risk perception in Italy?. In: Lollino, G., Arattano, M., Giardino, M., Oliveira, R., Peppoloni, S. (eds) Engineering Geology for Society and Territory 7, doi:10.1007/978-3-319-09303-1_13

Crescimbene, M., La Longa, F., Camassi, R., Pino, N.A. (2015). The seismic risk perception questionnaire.  In G*eological Society, London, Special Publications* 419, 69-77. doi:10.1144/SP419.4

Custodio, S., Silveira, G., Matias, L., Mata, I., Matos, C., Palma-Oliveira, J.M., Rocha, F., Lopes, F.C. (2016). Educating for Earthquake Science and Risk in a Tectonically Slowly Deforming Region. Seismol. Res. Lett. 87, 773-782. doi:10.1785/0220150239

Cvetkovic, V.M., Ocal, A., Ivanov, A. (2019). Young adults' fear of disasters: A case study of residents from Turkey, Serbia, and Macedonia. Int. J. Disaster Risk Reduct. 35, 101095. doi:10.1016/j.ijdrr.2019.101095

Dallo, I., Stauffacher, M., Marti, M. (2020). What defines the success of maps and additional information on a multi-hazard platform?. Int. J. Disaster Risk Reduct. 49, 101761. doi:10.1016/j.ijdrr.2020.101761

De Pascale, F., Bernardo, M., Muto, F., Di Matteo, D., Dattilo, V. (2017). Resilience and seismic risk perception at school: a geoethical experiment in Aiello Calabro, southern Italy. Nat. Hazards 86, 569–586. doi:10.1007/s11069-016-2696-z

Deline, M.B., Kahlor, L.A. (2019). Planned Risk Information Avoidance: A Proposed Theoretical Model. Commun. Theory 29, 272-294. doi:10.1093/ct/qty035

Devès, Maud H., Le Texier, Marion, Pécout, Hugues, Grasland, Claude (2019). Seismic risk: the biases of earthquake media coverage. Geosci. Commun. 2, 125-141. doi:10.5194/gc-2-125-2019

Dryhurst, S., Mulder, F., Dallo, I., Kerr, J.R., McBride, S.K., Fallou, L., Becker, J.S. (2022). Fighting misinformation in seismology: expert opinion on earthquake facts vs fiction. Front. Earth Sci. 10, 937055. doi:10.3389/feart.2022.937055

Fallou, L., Bossu, R., Landès, M., Roch, J., Roussel, F., Steed, R., Julien-Laferrière, S. (2020). Citizen Seismology without Seismologists? Lessons Learned from Mayotte Leading to Improved Collaboration. Front. Commun. 5, 49. doi:10.3389/fcomm.2020.00049

Fallou, L., Corradini, M., Bossu, R., Cheny, J.M. (2022). Preventing and debunking earthquake misinformation: Insights into EMSC’s practices. Front. Commun. 7, 993510. doi:10.3389/fcomm.2022.993510

Fallou, L., Marti, M., Dallo, I., Corradini, M. (2022). How to Fight Earthquake Misinformation: A Communication Guide. Seism. Res. Lett.  93, 2418–2422. doi:10.1785/0220220086

Falsaperla, S., Musacchio, G., Ferreira, M. A., Lopes, M., Oliveira, C. S., (2021). Dissemination: steps towards an effective action of seismic risk reduction for non-structural damage in the KnowRISK project. Ann. Geophys. 63, 3. doi:10.4401/ag-8394

Falsaperla, S., Reitano, D., Musacchio, G., (2022). Augmented Reality in Seismic Risk Management: A Contribution to the Reduction of Non-Structural Damage. Geosciences 12, 332. doi:10.3390/geosciences12090332

Ferreira, M.A., Meroni, F., Azzaro, R., Musacchio, G., Rupakhety, R., Bessason, B., Thorvaldsdottir, S., Lopes, M., Oliveira C.S., Solarino, S. (2021). What scientific information on the seismic risk to non-structural elements do people need to know? Part 1: Compiling an inventory on damage to non-structural element. Ann. Geophys. 64, SE321. doi:10.4401/ag-8412

Fokaefs, A., Sapountzaki, K. (2021). Crisis Communication after Earthquakes in Greece and Japan: Effects on Seismic Disaster Management. Sustainability 13, 9257. doi:10.3390/su13169257

Gaspar-Escribano, J.M., Iturrioz, T. (2011). Communicating earthquake risk: mapped parameters and cartographic representation. Nat. Hazards Earth Syst. Sci. 11, 359-366. doi:10.5194/nhess-11-359-2011

Gruev‐Vintila, A., Rouquette, M.L., (2007). Social Thinking about Collective Risk: How Do Risk‐related Practice and Personal Involvement Impact Its Social Representations? J. Risk. Res. 10, 555-581. doi:10.1080/13669870701338064

Herovic, E., Sellnow, T.L., Anthony, K.E. (2017). Risk Communication as Interacting Arguments: Viewing the L'aquila Earthquake Disaster Through the Message Convergence Framework. Argumentation and Advocacy 51, 73-86. doi:10.1080/00028533.2014.11821840

Herovic, E., Sellnow, T.L., Sellnow, D.D. (2018). Challenges and opportunities for pre-crisis emergency risk communication: lessons learned from the earthquake community. J. Risk. Res. 23, 349-364. doi:10.1080/13669877.2019.1569097

Höppner, C., Whittle, R., Bründl, M., Buchecker, M. (2012). Linking social capacities and risk communication in Europe: a gap between theory and practice? Nat. Hazards 64, 1753–1778. doi:10.1007/s11069-012-0356-5

Ickert, J., and Stewart, I.S. (2016). Earthquake risk communication as dialogue – insights from a workshop in Istanbul's urban renewal neighbourhoods. Nat. Hazards Earth Syst. Sci. 16, 1157-1173. doi:10.5194/nhess-16-1157-2016

Inal Onal, E., Ünal, Y., Tekeli-Yesil, S. (2021). Differences in the Preferences of Information Sources Between COVID-19 Pandemic and Earthquakes Among Young People in Turkey. J. Emerg. Manag. Disaster Commun. 2, 57-68. doi:10.1142/S2689980921500020

Jordan, T.H., Chen, Y.-T., Gasparini, P., Madariaga, R., Main, I., Marzocchi, W., Papadopoulos, G., Sobolev, G., Yamaoka, K., Zschau, J. (2011). Operational earthquake forecasting: State of knowledge and guidelines for utilization. Ann. Geophys. 54, 316-391. doi:10.4401/ag-5350

Katsikopoulos, P.V. (2021). Individual and community resilience in natural disaster risks and pandemics (covid-19): risk and crisis communication. Mind Soc. 20, 113-118. doi:10.1007/s11299-020-00254-0

Kouskouna, V., Sakkas, G., Cecic, I., Sakkas, S., Kaviris, G., Tertulliani, A. (2021). Earthquake induced crises: game tree approached risk communication and lessons learnt. Ann. Geophys. 63, 6. doi:10.4401/ag-8405

La Longa, F., Camassi. R., Crescimbene, M. (2012). Educational strategies to reduce risk: a choice of social responsibility. Ann. Geophys. 55, 445-451. doi:10.4401/ag-5525

Lacchia, A., Schuitema, G., McAuliffe, F. (2020). The human side of geoscientists: comparing geoscientists and non-geoscientists' cognitive and affective responses to geology. Geosci. Commun. 3, 291-302. doi:10.5194/gc-3-291-2020

Lamontagne, M., and Flynn B.W. (2014). Communications in the Aftermath of a Major Earthquake: Bringing Science to Citizens to Promote Recovery. Seismol. Res. Lett. 85, 561-565. doi:10.1785/0220130118

Lanza, T., Crescimbene, M., La Longa, F., D’Addezio, G. (2014). Bringing earth into the scene of a primary school: a science theatre experience. Sci. Commun. 36, 131-139. doi:10.1177/1075547012473841

Lopes, M., Musacchio, G., Ferreira, M.A., Oliveira, C.S. (2021). Empowering communities for non-structural seismic risk mitigation: the central role of communication. Ann. Geophys. 64, SE331. doi:10.441/ag-8471

Marincioni, F., Appiotti, F., Ferretti, M., Antinori, C., Melonaro, P., Pusceddu, A., Oreficini-Rosi, R. (2012). Perception and communication of seismic risk: The 6 April 2009 L'Aquila earthquake case study. Earthq. Spectra 28, 159-183. doi:10.1193/1.3672928

Marković Vukadin, I., Mustać, M., Nujić, L., Fio Firi, K., Martinjak, J., Marušić, Z., Baniček, M. (2021). Importance of Scientifically Based Facts in Crisis Communication: Evidence from Earthquakes in Zagreb and Petrinja. Sociologija i prostor 59, 222. doi:10.5673/sip.59.3.10

Marti, M., Stauffacher, M., Matthes, J., Wiemer, S. (2018). Communicating Earthquake Preparedness: The Influence of Induced Mood, Perceived Risk, and Gain or Loss Frames on Homeowners’ Attitudes Toward General Precautionary Measures for Earthquakes: Communicating Earthquake Preparedness. Risk Anal. 38, 710-723. doi:10.1111/risa.12875

Masi, A., Mucciarelli, M., Chiauzzi, L., Camassi, R., Loperte, G., Santarsiero, G. (2014). Emergency preparedness activities performed during an evolving seismic swarm: The experience of the Pollino (southern Italy) sequence. Boll. Geofis. Teor. Appl. 55, 665-682. doi:10.4430/bgta0115

Meita, V., Dobre, D., Georgescu, E.S., Stamatiade, C.P., Vilceanu, L. (2014). Coping with earthquakes in Romania: Advanced concepts and learning tools using a training platform and facility. Int. J. Emerg. Manag. 10, 288-299. doi:10.1504/IJEM.2014.066490

Mignan, A., Scolobig, A., Sauron, A. (2016). Using reasoned imagination to learn about cascading hazards: a pilot study. Disaster Prevention and Management, 25, 329-344. doi:10.1108/DPM-06-2015-0137

Mohadjer, S., Mutz, S. G., Kemp, M., Gill, S. J., Ischuk, A., and Ehlers, T. A. (2021). Using paired teaching for earthquake education in schools. Geosci. Commun 4, 281–295. doi:10.5194/gc-4-281-2021, 2021

Musacchio, G., Piangiamore, G.L., D’Addezio, G., Solarino, S. Eva, E. (2015). “Scientist as a game”: learning geoscience via competitive activities. Ann. Geophys. 58, 5. doi:10.4401/ag-6695

Musacchio, G., and Piangiamore, G.L. (2016). The 2016 Amatrice seismic sequence in the media. Ann. Geophys. 59, 1-7. doi: 10.4401/AG-7263

Musacchio, G., Falsaperla, S., Bernhardsdóttir, A.E., Ferreira, M.A., Sousa, M.L., Carvalho, A., Zonno, G. (2016). Education: Can a bottom-up strategy help for earthquake disaster prevention? Bull. Earthq. Eng. 14, 2069–2086. doi:10.1007/s10518-015-9779-1

Musacchio, G., Falsaperla, S., Sansivero, F., Ferreira, M.A., Oliveira, C.S., Nave, R., Zonno, G. (2016). Dissemination strategies to instil a culture of safety on earthquake hazard and risk. Bull. Earthq. Eng. 14, 2087-2103. doi:10.1007/s10518-015-9782-6

Musacchio, G., Solarino, S., Ferreira, M.A., Lopes, M., Oliveira, C.S., Silva, D.S., Rupakhety, R., and the KnowRISK Team (2017). The KnowRISK project: when communication becomes prevention. In Atti del 36° Convegno Nazionale GNGTS - Gruppo Nazionale di Geofisica della Terra Solida, Trieste 14-16 novembre 2017, 502-506.

Musacchio, G., and Solarino, S. (2019). Seismic risk communication: an opportunity for prevention. Boll. Geofis. Teor. Appl. 60, 295-314. doi:10.4430/bgta0273

Musacchio, G., Eva, E., Piangiamore, G. L. (2019). "The KnowRISK action for schools: a case study in Italy". in Proceedings of the International Conference on Earthquake Engineering and Structural Dynamics. ICESD 2017, eds. Rupakhety, R. Olafsson, S. Bessason, B.  Geotechnical, Geological and Earthquake Engineering (Springer) 47, 459–470. doi:10.1007/978-3-319-78187-7_34

Musacchio, G., Falsaperla, S., Solarino, S., Piangiamore, G.L., Crescimbene, M., Pino, N.A., Eva, E., Reitano, D., Manzoli, F., Fabbri, M., Butturi, M., Accardo, M. (2019). "KnowRISK on seismic risk communication: The set-up of a participatory strategy- Italy case study". in Proceedings of the International Conference on Earthquake Engineering and Structural Dynamics. ICESD 2017, eds. Rupakhety, R. Olafsson, S. Bessason, B.  Geotechnical, Geological and Earthquake Engineering (Springer) 47, 413–427. doi:10.1007/978-3-319-78187-7_31

Musacchio, G., Ferreira M.A., Meroni F., Rupakhety R., Oliveira C.S., Zonno G. (2019). "Urban disaster prevention strategies in the UPStrat-MAFA project: From risk analysis to communication". in Proceedings of the International Conference on Earthquake Engineering and Structural Dynamics. ICESD 2017, eds. Rupakhety, R. Olafsson, S. Bessason, B.  Geotechnical, Geological and Earthquake Engineering (Springer) 47, 337–356. doi:10.1007/978-3-319-62099-2_17

Musacchio, G., Eva, E., Crescimbene, M., Pino, N.A., Cugliari, L. (2021). A protocol to communicate seismic risk in schools: design, test, and assessment in Italy. Ann. Geophys. 64, SE325. doi:10.4401/ag-8533

Mustać, M., Dasović, I., Latečki, H., Cecić, I. (2021). The public response and educational outreach through social media after the Zagreb earthquake of 22 March 2020. Geofizika (Online) 38, 215-234. doi:10.15233/gfz.2021.38.7

Nunes, A., Martins B., Azevedo, M. (2020). Exploring the Spatial Perception of Risk in Portugal by Students of Geography. J. Geogr. 119, 171-182. doi:10.1080/00221341.2020.1801803

Okazaki S., Benavent-Climent A., Navarro A., Henseier J. (2015). Responses When the Earth Trembles: The Impact of Community Awareness Campaigns on Protective Behavior. Journal of Public Policy & Marketing 34, 43191. doi:10.1509/jppm.13.045

Oliveira, C.S., Lopes, M., Musacchio, G., Silva, D.S., Rupakhety, R., Ferreira, M.A. (2018). The Knowrisk Project: Objectives and Achievements. Proceedings of the 16th European Conference on Earthquake engineering, Thessaloniki 18-21 June 2018, 1-8.

Paradiso, M. (2012). Information and Communication Technologies and Environmental Safety: The Case of Naples-Vesuvius, Italy. J. Urban Technol. 19, 45-48. doi: 10.1080/10630732.2012.715480

Peruzza, L., Saraò, A., Barnaba, C., Bragato, P.L., Dusi, A., Grimaz, S., Malisan, P., Mucciarelli, M., Zuliani, D., Cravos, C. (2016). Teach and Learn Seismic Safety at High School: the SISIFO project. Boll. Geofis. Teor. Appl. 57, 129-146. doi:10.4430/bgta0157

Peruzza, L., Saraò, A., Barnaba, C., Massolino, G. (2018). Elapsed time: 40 years. What young people of Friuli Venezia Giulia know about the 1976 earthquakes, natural hazard, and seismic safety. Boll. Geofis. Teor. Appl. 59, 575-588. doi:10.4430/bgta0227

Petal, M. (2008). Disaster risk reduction education material development, organization, and evaluation. Regional Development Dialogue Journal 28, 1-20.

Piangiamore, G.L., Falsaperla, S., Eva, E., Musacchio, G. (2021). Seismic risk communication let’s students show their own way. Ann. Geophys. 63, 4. doi:10.4401/ag-8396

Piangiamore, G.L., Musacchio, G., Pino, N.A. (2015). Natural hazards revealed to children: the other side of prevention. Geological Society, London, Special Publications 419, 171-181. doi:10.1144/SP419.12

Pignone, M., Amato, A., Nostro, C., Casarotti, E., Meletti, C., Quintiliani, M., Lauciani, V. (2022). Public earthquake communication in Italy through a multi-source social media platform: The INGVterremoti experience (2010–2022). Front. Earth Sci. 10, 1003867. doi:10.3389/feart.2022.1003867

Platt, S., Musacchio, G., Crescimbene, M., Pino, N.A., Silva, D.S, Ferreira, M.A., Oliveira, C.S, Lopes, M., Rupakhety, R., (2019). "Development of a common (European) tool to assess earthquake risk communication". in Proceedings of the International Conference on Earthquake Engineering and Structural Dynamics. ICESD 2017, eds. Rupakhety, R. Olafsson, S. Bessason, B.  Geotechnical, Geological and Earthquake Engineering (Springer) 47, 493–510. doi:10.1007/978-3-319-78187-7_37

Postiglione, I., Masi, A., Mucciarelli, M., Lizza, C., Camassi, R., Bernabei, V., Piacentini, V., Chiauzzi, L., Brugagnoni, B., Cardoni, A., Calcara, A., Diludovico, M., Giannelli, M., Rita, R., Lapietra, M., Bernardini, F., Nostro, C., Pignone, M., Peruzza, L. (2016). The Italian Communication Campaign "I Do Not Take Risks - Earthquake". Boll. Geofis. Teor. Appl. 57, 147-160. doi:10.4430/bgta0173

Quitoriano, V., and Wald, D.J. (2020). USGS “Did You Feel It?”—Science and Lessons From 20 Years of Citizen Science-Based Macroseismology. Front. Earth Sci. 8, 120. doi:10.3389/feart.2020.00120

Rego, I.E., Pereira, S.M., Morro, J., Pacheco, M.P. (2018). Perceptions of seismic and volcanic risk and preparedness at São Miguel T Island (Azores, Portugal). Int. J. Disaster Risk Reduct. 31, 498-503. doi: 10.1016/j.ijdrr.2018.06.008

Reitano, D., Falsaperla, S., Musacchio. G., Merenda, R. (2019). "Awareness on seismic risk: How can augmented reality help". in Proceedings of the International Conference on Earthquake Engineering and Structural Dynamics. ICESD 2017, eds. Rupakhety, R. Olafsson, S. Bessason, B.  Geotechnical, Geological and Earthquake Engineering (Springer) 47, 485–492. doi:10.1007/978-3-319-78187-7_36

Rodríguez-Giralt, I., Arenas, M., Gómez López, D. (2020). "Children, participation and disasters in Europe: A poor record". in:  Children and Young People’s Participation in Disaster Risk Reduction: Agency and Resilience, eds Mort M., et al.  (Bristol: University Press), 15-36.

Saraò, A., Clocchiatti, M., Barnaba, C., Zuliani, D., (2016). Using an Arduino Seismograph to Raise Awareness of Earthquake Hazard Through a Multidisciplinary Approach. Seismol. Res. Lett. 87, 186-192. doi:10.1785/0220150091

Savadori, L., Ronzani, P., Sillari, G., Di Bucci, D., Dolce, M. (2022). Communicating Seismic Risk Information: The Effect of Risk Comparisons on Risk Perception Sensitivity. Front. Commun. 7, 743172. doi:10.3389/fcomm.2022.743172

Scaini, C., Peresan, A., Tamaro, A., Poggi, V., Barnaba, C. (2022). Can high-school students contribute to seismic risk mitigation? Lessons learned from the development of a crowd-sourced exposure database. Int. J. Disaster Risk Reduct. 69, 102755. doi:10.1016/j.ijdrr.2021.102755

Scolobig, A., Komendantova, N., Mignan, A. (2017). Mainstreaming Multi-Risk Approaches into Policy. Geosciences 7, 129. doi:10.3390/geosciences7040129

Shreve, C., Begg, C., Fordham, M., Muller, A. (2016). Operationalizing risk perception and preparedness behavior research for a multi-hazard context. Environmental Hazards 15, 227-245. doi:10.1080/17477891.2016.1176887

Solarino, S., Ferreira, M. A., Musacchio, G., Rupakhety, R., O’Neill, H., Falsaperla, S., Vicente, M., Lopes, M., Oliveira, C.S. (2021). What scientific information on non-structural elements seismic risk people need to know? Part 2: tools for risk communication. Ann. Geophys. 64, SE322. doi:10.4401/ag-8439

Solarino, S., Ferreira, M.A., Musacchio, G., Eva, E. (2021). Playing games for risk prevention: design, implementation and testing of serious games in recent European projects UPStrat-MAFA and KnowRISK. Ann. Geophys. 63, 8. doi:10.4401/ag-8436

Solberg, C., Rossetto, T., Joffe, H. (2010). The social psychology of seismic hazard adjustment: re-evaluating the international literature. Nat. Hazards Earth Syst. Sci. 10, 1663-1677. doi:10.5194/nhess-10-1663-2010

Sousa e Silva, D., Pereira, A., Vicente, M., Bernardo, R., Ferreira, M.A., Lopes, M., Sousa Oliveira, C. (2019). Seismic Risk Communication: How to Assess It? The Case of Lisbon Pilot-Area. in Proceedings of the International Conference on Earthquake Engineering and Structural Dynamics. ICESD 2017, eds. Rupakhety, R. Olafsson, S. Bessason, B. Geotechnical, Geological and Earthquake Engineering (Springer) 47, 429–443. doi:10.1007/978-3-319-78187-7_32

Spence, R. (2007). Saving lives in earthquakes: successes and failures in seismic protection since 1960. Bull. Earthq. Eng. 5, 139–251. doi:10.1007/s10518-006-9028-8

Stewart, I.S, Ickert, J., Lacassin, R. (2018). Communicating Seismic Risk: The Geoethical Challenges of a People-Centred, Participatory Approach. Ann. Geophys. 60, 19. doi:10.4401/ag-7593

Tan, M.L., Becker, J.S., Stock, K., Prasanna, R., Brown, A., Kenney, C., Cui, A., Lambie, E. (2022). Understanding the social aspects of earthquake early warning: A literature review. Front. Commun. 7, 939242. doi:10.3389/fcomm.2022.939242

Tataru, D., Toma Danila, D., Nastase, E. (2011). "MOBEE: A science campaign to urge earthquake preparedness in quake-prone countries". in SGEM2017 17th International Multidisciplinary Scientific GeoConference and EXPO 17, 121-128. doi:10.5593/sgem2017/54/S22.016

Tataru, D., Zaharia, B., Grecu, B., Tibu, S., Brisan, N., Georgescu, E.S. (2016). Seismology in Romanian Schools: education, outreach, monitoring and research. Rom. Rep. Phys. 68, 1589–1602.

Tekeli-Yesil S., Pfeiffer C., Tanner M. (2020). The determinants of information seeking behaviour and paying attention to earthquake-related information. Int. J. Disaster Risk Reduct. 49, 101734. doi:10.1016/j.ijdrr.2020.101734

Tekeli-Yesil, S., Kaya, M. Tanner, M., (2019). The role of the print media in earthquake risk communication: information available between 1996 and 2014 in Turkish newspapers. Int. J. Disaster Risk Reduct. 33, 284-289. doi:10.1016/j.ijdrr.2018.10.014

Vanciu-Rău, A., Țigănescu, A., Tătaru, D., Rău, D. (2020). The seismic simulator as a didactic tool for seismic education. In AIP Conference Proceedings 2218, 060004. doi:10.1063/5.0001037

Vicente, R., Ferreira, T.M., M., Maio R., Koch, H. (2014). Awareness, Perception and Communication of Earthquake Risk in Portugal: Public Survey. Procedia Econ. Financ. 18, 271-278. doi:10.1016/S2212-5671(14)00940-X

Vlek, C. (2019). The Groningen Gasquakes: Foreseeable Surprises, Complications of Hard Science, and the Search for Effective Risk Communication. Seismol. Res. Lett. 90, 1071-1077. doi:10.1785/0220180368

Wang, N., Clowdus, Z., Sealander, A., Stern, R. (2022). Geonews: timely geoscience educational YouTube videos about recent geologic events. Geosci. Commun. 5, 125-142. doi:10.5194/gc-5-125-2022

Zaharia, B., Șerbu, F., Tătaru, D., Grecu, B., Năstase, E. (2016). “Hands on activity” - Building your own seismometer in classroom. SGEM2016 Conference Proceedings 3, 1085-1092. doi:10.5593/SGEM2016/B53/S22.141

Zaharia, B., Tataru, D., Grecu, B., Ionescu, C., Speranta, T., Brisan, N.B., Georgescu, E.S. (2013). "Romanian educational seismic network: Educational tool for increasing awareness of seismic risk". in SGEM2017 17th International Multidisciplinary Scientific GeoConference and EXPO 2, 513 - 520. doi:10.5593/SGEM2013/BE5.V2/S22.022

Zollo, A., Bobbio, A., Berenguer, J.L., Courboulex, F., Denton, P., Festa, G., Sauron, A., Solarino, S., Haslinger, F., Giardini, D. (2014). "The European Experience of Educational Seismology". in Geoscience Research and Outreach. Innovations in Science Education and Technology, ed. Tong, V. (Dordrecht:  Springer) 21, 145-170. doi:10.1007/978-94-007-6943-4_10
